# Supplementary material for: Cyclic peptides can engage a single binding pocket through multiple, entirely divergent modes
Source: bioRxiv or medRxiv preprint supplement (doi:10.1101/850321), 2019-11-21
Supplement: Supplementary file [file media-1.pdf]

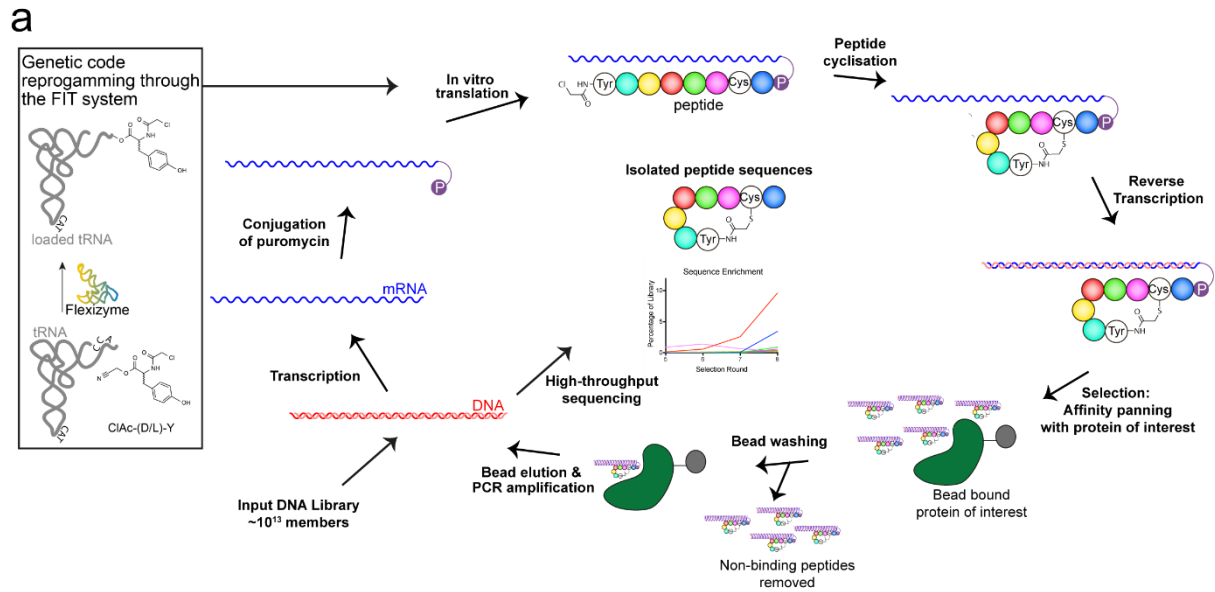

**b**

m = 3-7  
n = 4-7

ATG(NNK)mATG(NNK)nTGTGGGTCTGGGTCTGGGTCTTAG

Peptide Sequence                      Linker                      Stop Codon

| 1st | 2nd |     |      |     | 3rd |
|-----|-----|-----|------|-----|-----|
|     | U   | C   | A    | G   |     |
| U   | Phe | Ser | Tyr  | Cys | U   |
|     | Leu | Ser | Stop | Trp | G   |
| C   | Leu | Pro | His  | Arg | U   |
|     | Leu | Pro | Gln  | Arg | C   |
| A   | Ile | Thr | Asn  | Ser | A   |
|     | KAc | Thr | Lys  | Arg | G   |
| G   | Val | Ala | Asp  | Gly | U   |
|     | Val | Ala | Glu  | Gly | C   |

Initiator = CIAc-Trp

**Supplementary Figure 1.** Overview of the RaPID system. A. Schematic of the RaPID selection scheme. B. Codon assignment used in the RaPID selections.

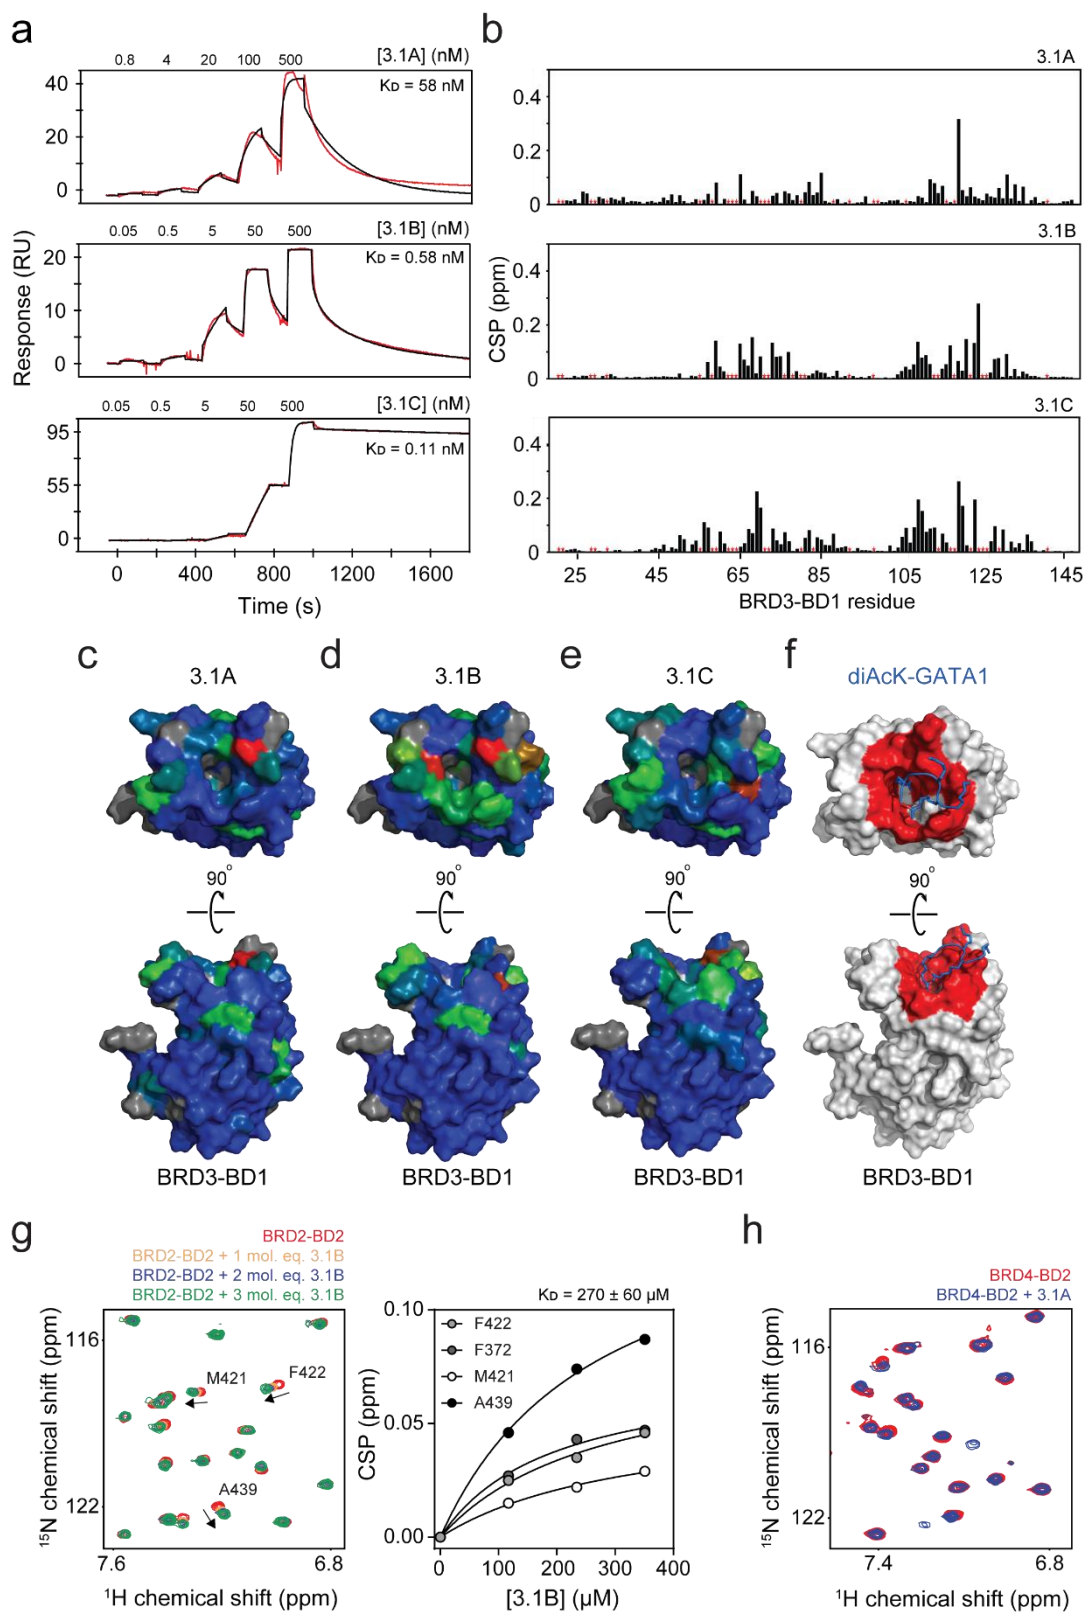

**Supplementary Figure 2. A. RaPID peptides bind BRD3-BD1 in the canonical AcK-binding pocket.** **a.** Representative SPR sensorgrams for BRD3-BD1 binding to **3.1A** (upper panel), **3.1B** (middle panel), and **3.1C** (bottom panel). **b.** Chemical shift perturbations in the <sup>15</sup>N-HSQC of BRD3-BD1 upon formation of complexes with either **3.1A** (upper panel), or **3.1B** (middle panel), or **3.1C** (lower panel). The red stars indicate unassigned residues. **c.** CSPs observed upon formation of the **3.1A** complex mapped onto the structure of BRD3-BD1 (PDB: 3S91)<sup>1</sup>. The degrees of CSP are displayed

through a blue-green-red gradient: the blue portions of the structure do not undergo any CSPs and the red sections represent the residues that display the greatest CSPs. Grey regions indicate unassigned residues. **d.** CSPs observed upon the **3.1B** complex mapped onto the structure of BRD3-BD1 (PDB: 3S91)<sup>1</sup>. The degrees of CSP are displayed through a blue-green-red gradient: the blue portions of the structure do not undergo any CSPs and the red sections represent the residues that display the greatest CSPs. Grey regions indicate unassigned residues. **e.** CSPs from the **3.1C** complex are mapped onto the structure of BRD3-BD1 (PDB: 3S91)<sup>1</sup>. The degrees of CSP are displayed through a blue-green-red gradient: the blue portions of the structure do not undergo any CSPs and the red sections represent the residues that display the greatest CSPs. Grey regions indicate unassigned residues. **f.** Structure of the BRD3-BD1 complex with a diacetylated-GATA1 peptide (2L5E, the peptide is shown in *blue* and the BD is shown in *grey*)<sup>2</sup>, highlighting BD residues (*red*) that directly contact the peptide. **g.** Overlaid section of <sup>15</sup>N-HSQC spectra of BRD2-BD2 alone (*red*) or in the presence of one (*yellow*), two (*blue*), or three (*green*) molar equivalents of **3.1B**. Signals that undergo the greatest CSPs in the are labelled in the protein alone spectrum. Binding curves were derived by tracking the combined <sup>15</sup>N/<sup>1</sup>H chemical shift perturbations of the signals undergoing the greatest CSPs. The data were fitted to a simple 1:1 Langmuir binding isotherm using Graphpad. **h.** Overlaid <sup>15</sup>N-HSQC spectra of BRD4-BD2 alone (*red*) or in the presence of one (*blue*) molar equivalent of **3.1A**.

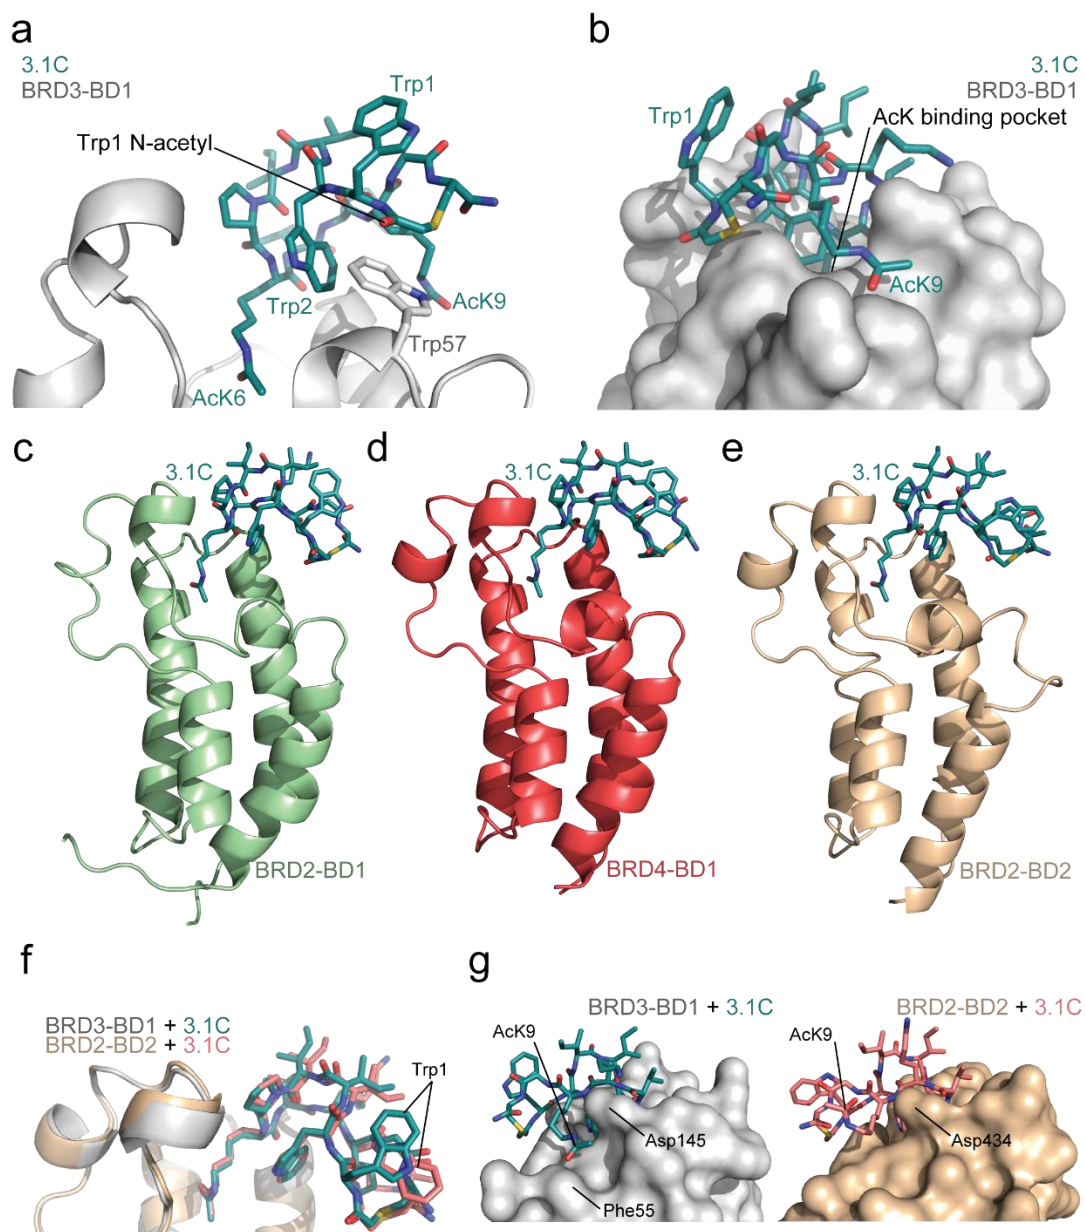

**Supplementary Figure 3. X-ray crystal structures of BRD2-BD1, BRD4-BD1 and BRD2-BD2 bound to 3.1C. a.**

**a.** The structure of BRD3-BD1 (*grey*) in complex with **3.1C** (*teal*) showing the sandwich of Trp57 from the BD between the Trp2 sidechain and the N-acetyl moiety of Trp1 from **3.1C**. **b.** Surface representation of BRD3-BD1 (*grey*) when in complex with **3.1C** (*teal*). AcK9 of **3.1C** interacts with a groove formed on the surface of the BD between the  $\alpha Z$  and  $\alpha D$  helices at a location distal to the AcK binding pocket. **c.** Ribbon representation of the X-ray crystal structure of BRD2-BD1 (*pale green*) bound to **3.1C** (*teal*, 2.3 Å resolution, PDB ID 6U61). **d.** Ribbon representation of the X-ray crystal structure of BRD4-BD1 (*coral red*) bound to **3.1C** (*teal*, 1.7 Å resolution, PDB IDs 6U6K). **e.** Ribbon representation of the X-ray crystal structure of BRD2-BD2 (*wheat*) bound to **3.1C** (*teal*, 1.5 Å resolution, PDB ID 6U71). **f.** Overlay of the BRD3-BD1:**3.1C** complex with the BRD2-BD2:**3.1C** complex. One of the major differences between the two peptide structures, the 180° flipping of the Trp1 sidechain, is indicated. **g.** Comparison of the orientation of AcK9 of **3.1C** and the surface representation the two BDs from the BRD3-BD1:**3.1C** and BRD2-BD2:**3.1C** complexes. BRD2-BD2 lacks the groove that AcK9 rests upon in the BRD3-BD1:**3.1C** structure leading to the residue being oriented upwards into the solvent in the BRD2-BD2:**3.1C** structure.

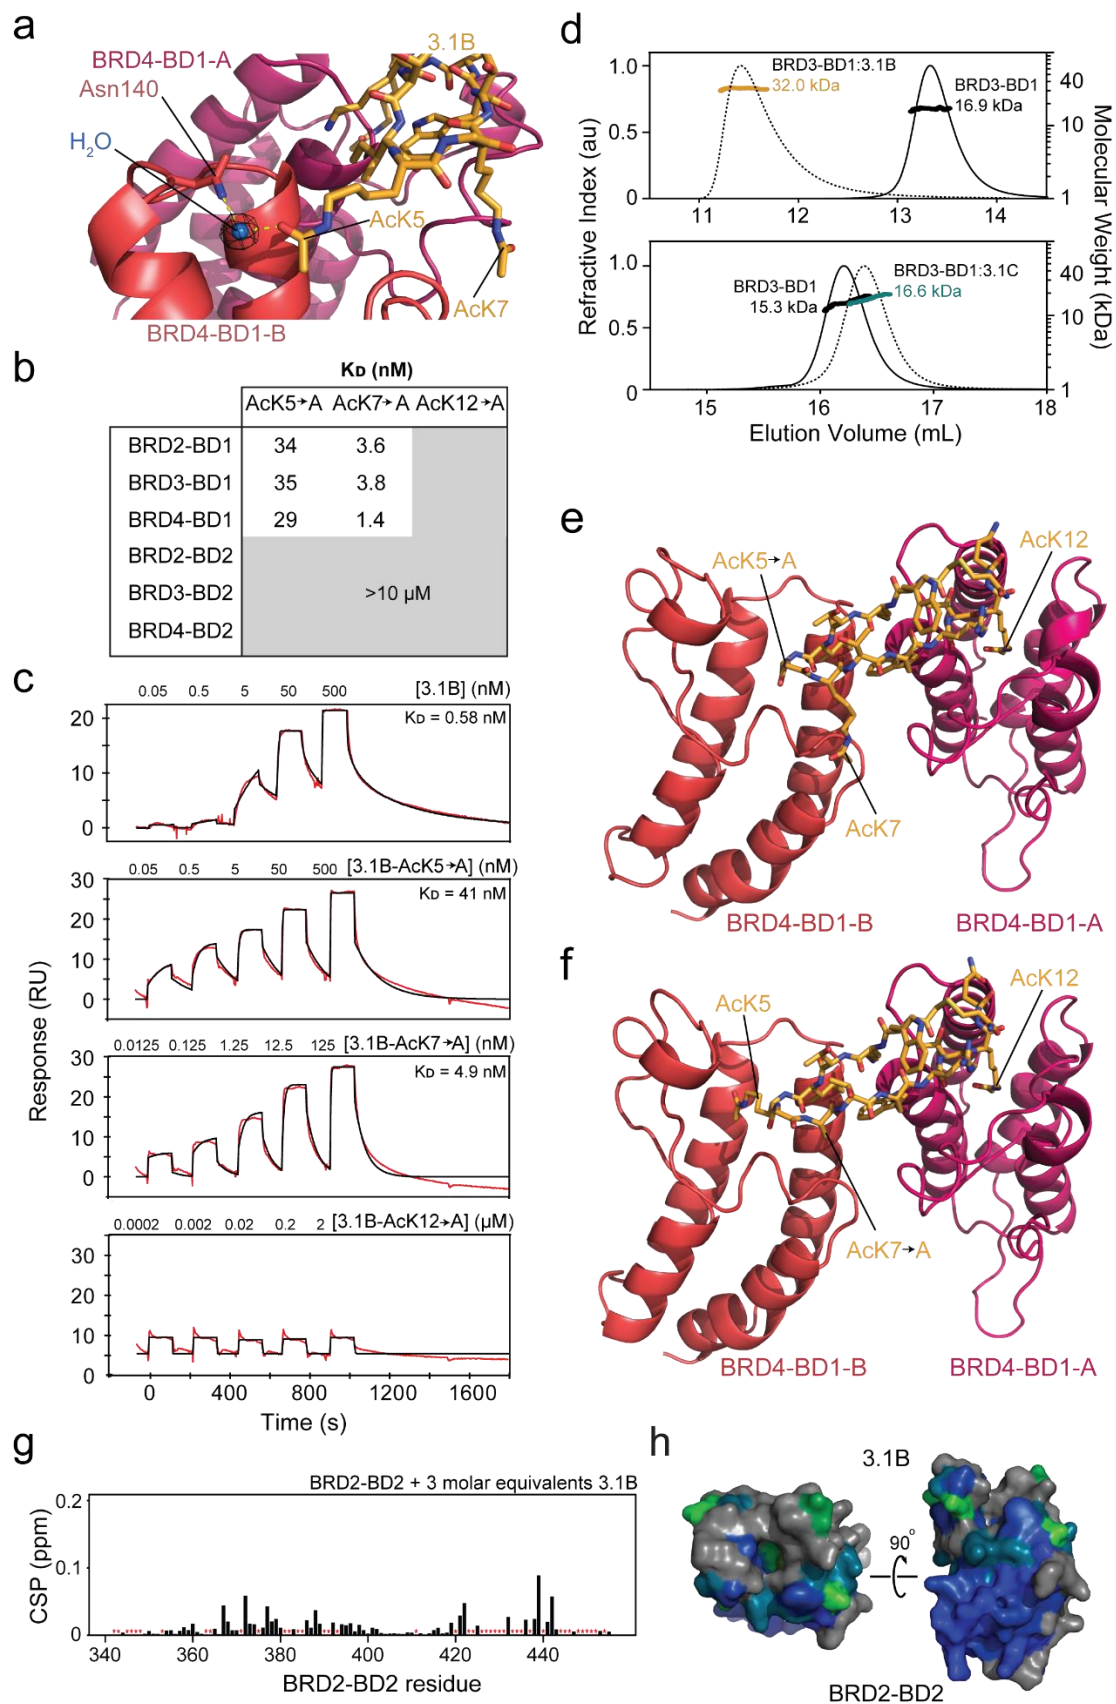

**Supplementary Figure 4. Analysis of BRD3/4-BD1:3.1B complexes.** **a.** A close up view of the water-mediated interaction between Asn140 of BRD4-BD1-B (*coral red*) and AcK5 of **3.1B** (*orange*). AcK5

enters the binding pocket at a distinct angle to the canonical AcK binding mode and forms a hydrogen bond with a water molecule (shown as a *blue sphere*) which in turn forms a hydrogen bond with Asn140. The electron density for the water is shown and hydrogen bonding is indicated by yellow dashed lines.

**b.** Dissociation constants for the binding of each of the six BDs to **3.1B** AcK mutants. **c.** SPR data (*red*) for the binding of BRD3-BD1 to **3.1B** (*top*) and to AcK5→Ala, AcK7→Ala and AcK12→Ala mutants. Fits to a simple 1:1 binding model (*black*) are shown and derived  $K_D$ s are indicated on each plot. **d.** *Top:* Size-exclusion chromatogram for BRD3-BD1 alone (solid line) and in the presence of one molar equivalent of **3.1B** (dashed line). The calculated molecular weight trace from MALLS analysis is also shown. *Bottom:* Size-exclusion chromatogram for BRD3-BD1 alone (solid line) and in the presence of one molar equivalent of **3.1C** (dashed line). The calculated molecular weight trace from MALLS analysis is also shown. BRD3-BD1 alone elutes as a single peak with the expected mass of 17 kDa. Addition of one molar equivalent of **3.1B** ( $M_w = 1.9$  kDa) shifts the peak to an earlier elution time and yields a mass of 32 kDa, in close agreement with the expected mass of a 2:1 BD-**3.1B** complex. **e.** Ribbon diagram of the BRD4-BD1:**3.1B**\_AcK5→Ala X-ray crystal structure (2.3 Å resolution, PDB ID 6U72). The peptide is shown in *orange* and the two BDs bound to the peptide are shown in pink (BRD4-BD1-A) and *coral red* (BRD4-BD1-B). The AcK5→Ala replacement and remaining AcKs are indicated. **f.** Ribbon diagram of the BRD4-BD1:**3.1B**\_AcK7→Ala X-ray crystal structure (2.6 Å resolution, PDB ID 6U8G). The peptide is shown in *orange* and the two BDs bound to the peptide are shown in pink (BRD4-BD1-A) and *coral red* (BRD4-BD1-B). The AcK7→Ala replacement and remaining AcKs are indicated. **g.** Chemical shift perturbations in the  $^{15}\text{N}$ -HSQC of BRD2-BD2 upon formation of complexes following addition of three molar equivalents of **3.1B**. The red stars indicate unassigned residues. **h.** CSPs observed upon formation of the **3.1B** complex mapped onto the structure of BRD2-BD2 (PDB: 3ONI)<sup>1</sup>. The degrees of CSP are displayed through a blue-green-red gradient: the blue portions of the structure do not undergo any CSPs and the red sections represent the residues that display the greatest CSPs. Grey regions indicate unassigned residues.



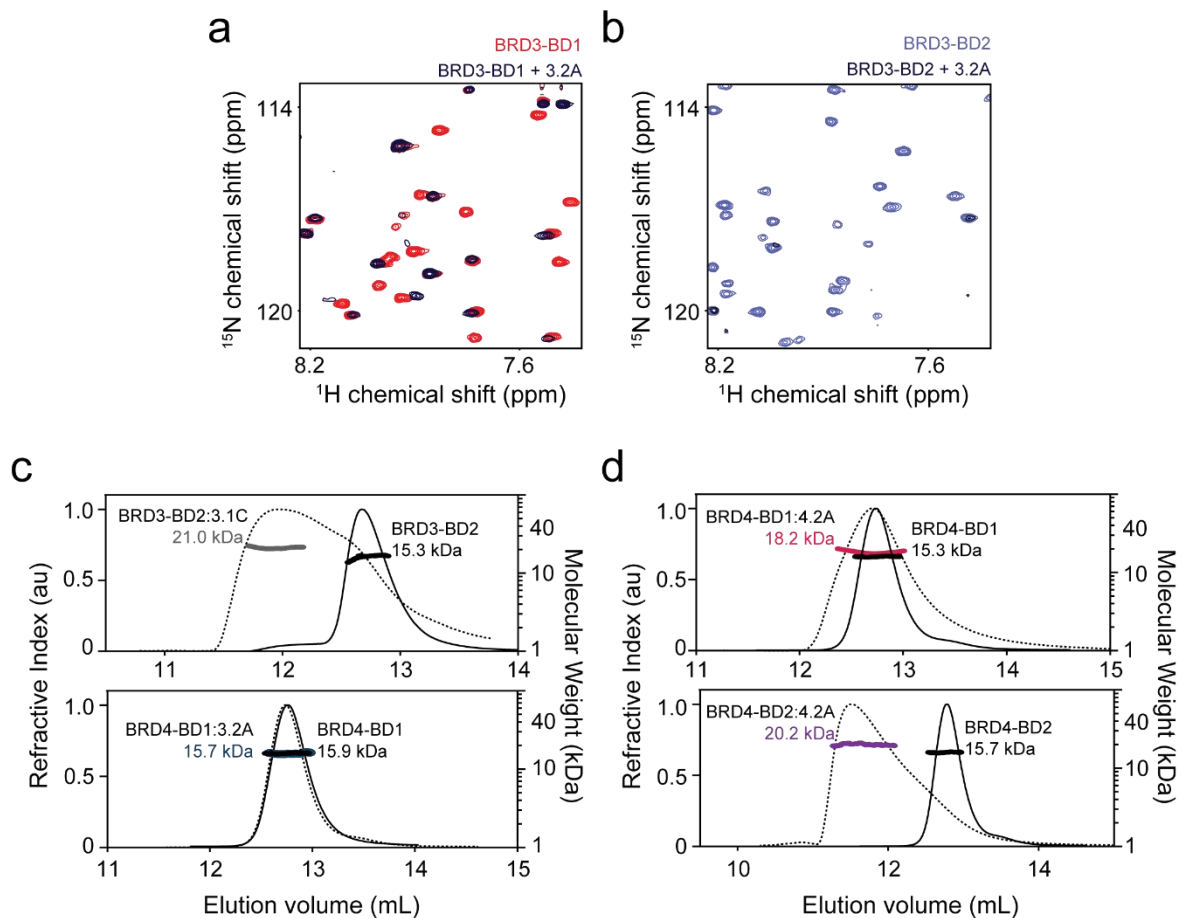

**Supplementary Figure 5.  $^{15}\text{N}$ -HSQC analysis of interactions with 3.2A.** **a.** Overlaid  $^{15}\text{N}$ -HSQC spectra of BRD3-BD1 alone (*red*) or in the presence of 1.5 molar equivalents of **3.2A** (*dark purple*). **b.** Overlaid  $^{15}\text{N}$ -HSQC spectra of BRD3-BD2 alone (*light purple*) or in the presence of 0.5 molar equivalents of **3.2A**. There is a mass disappearance of signals upon addition of **3.2A**. **c. Top:** Size-exclusion chromatogram for BRD3-BD2 alone (solid line) and in the presence of 0.5 molar equivalents of **3.2C** (dashed line). The calculated molecular weight from MALLS analysis is also shown. Addition of 0.5 molar equivalents of **3.2C** leads to a shift from a peak that yields a mass of 15.3 kDa (BRD3-BD2 alone) to species with an earlier elution time that yields a molecular weight of 21.0 kDa, suggesting the formation of a weak 2:1 BD:**3.2C** complex. **Bottom:** Size-exclusion chromatogram for BRD4-BD1 alone (solid line) and in the presence of 0.5 molar equivalents of **3.2A** (dashed line). The calculated molecular weight from MALLS analysis is also shown. **d. Top:** Size-exclusion chromatogram for BRD4-BD1 alone (solid line) and in the presence of 0.5 molar equivalent of **4.2A** (dashed line). The calculated molecular weight trace from MALLS analysis is also shown. **Bottom:** Size-exclusion chromatogram for BRD4-BD2 alone (solid line) and in the presence of one molar equivalent of **3.1C** (dashed line). The calculated molecular weight trace from MALLS analysis is also shown. BRD4-BD1 alone elutes as a single peak with the expected mass of 15.3 kDa. Addition of 0.5 molar equivalent of **4.2A** causes peak broadening and yields a mass of 18.3 kDa, consistent with a 1:1 BD:**4.2A** complex. Addition of 0.5 molar equivalents of **4.2A** to BRD4-BD2 leads to a shift from a peak that yields a mass of 15.7 kDa (BRD4-BD2 alone) to a species with an earlier elution time that yields a molecular weight of 20.2, indicating the formation of a weak 2:1 BD:**4.2A** complex.

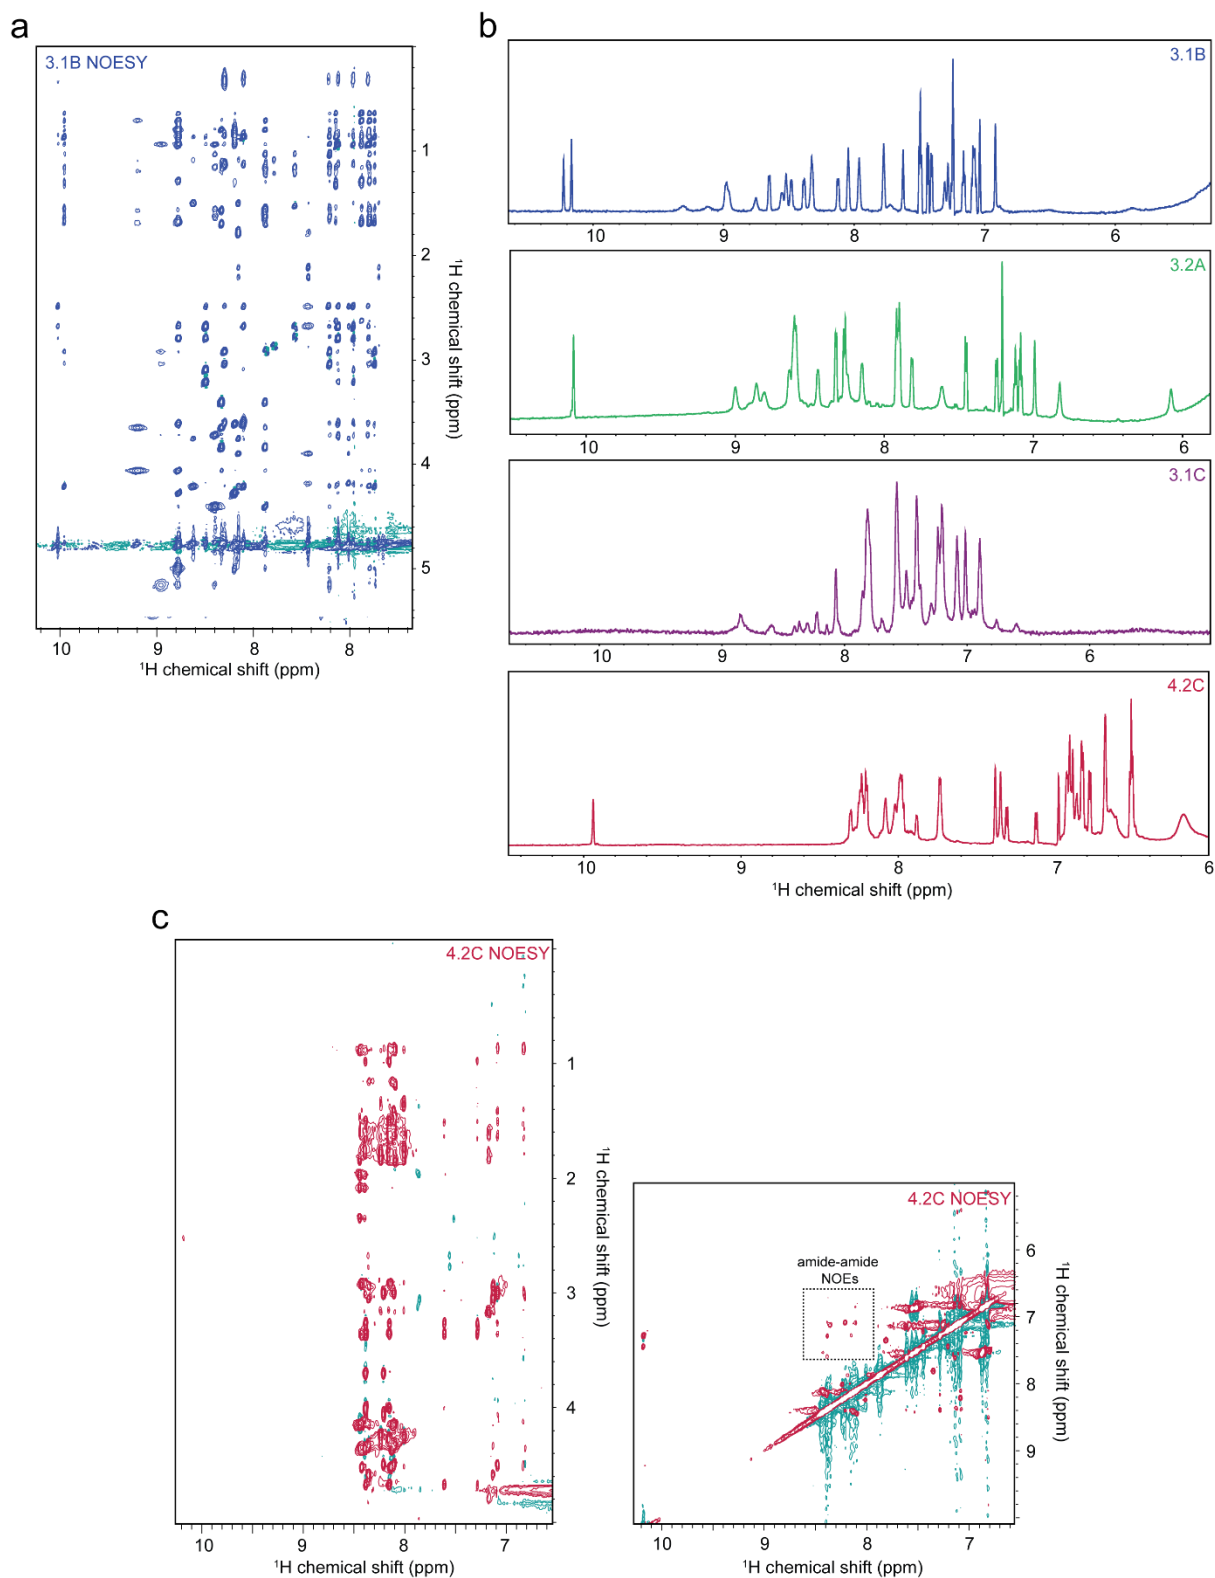

**Supplementary Figure 6. Two-dimensional NOESY and one-dimensional  $^1\text{H}$ -NMR spectra of selected peptides. a.** Section of a two-dimensional NOESY spectra of **3.1B**. **b.** One-dimensional  $^1\text{H}$ -NMR spectra of **3.1B**, **3.2A**, **3.1C**, and **4.2C**. **c.** Sections of two-dimensional NOESY spectra of **4.2C**. All spectra were collected at 25 °C on an 800-MHz spectrometer.



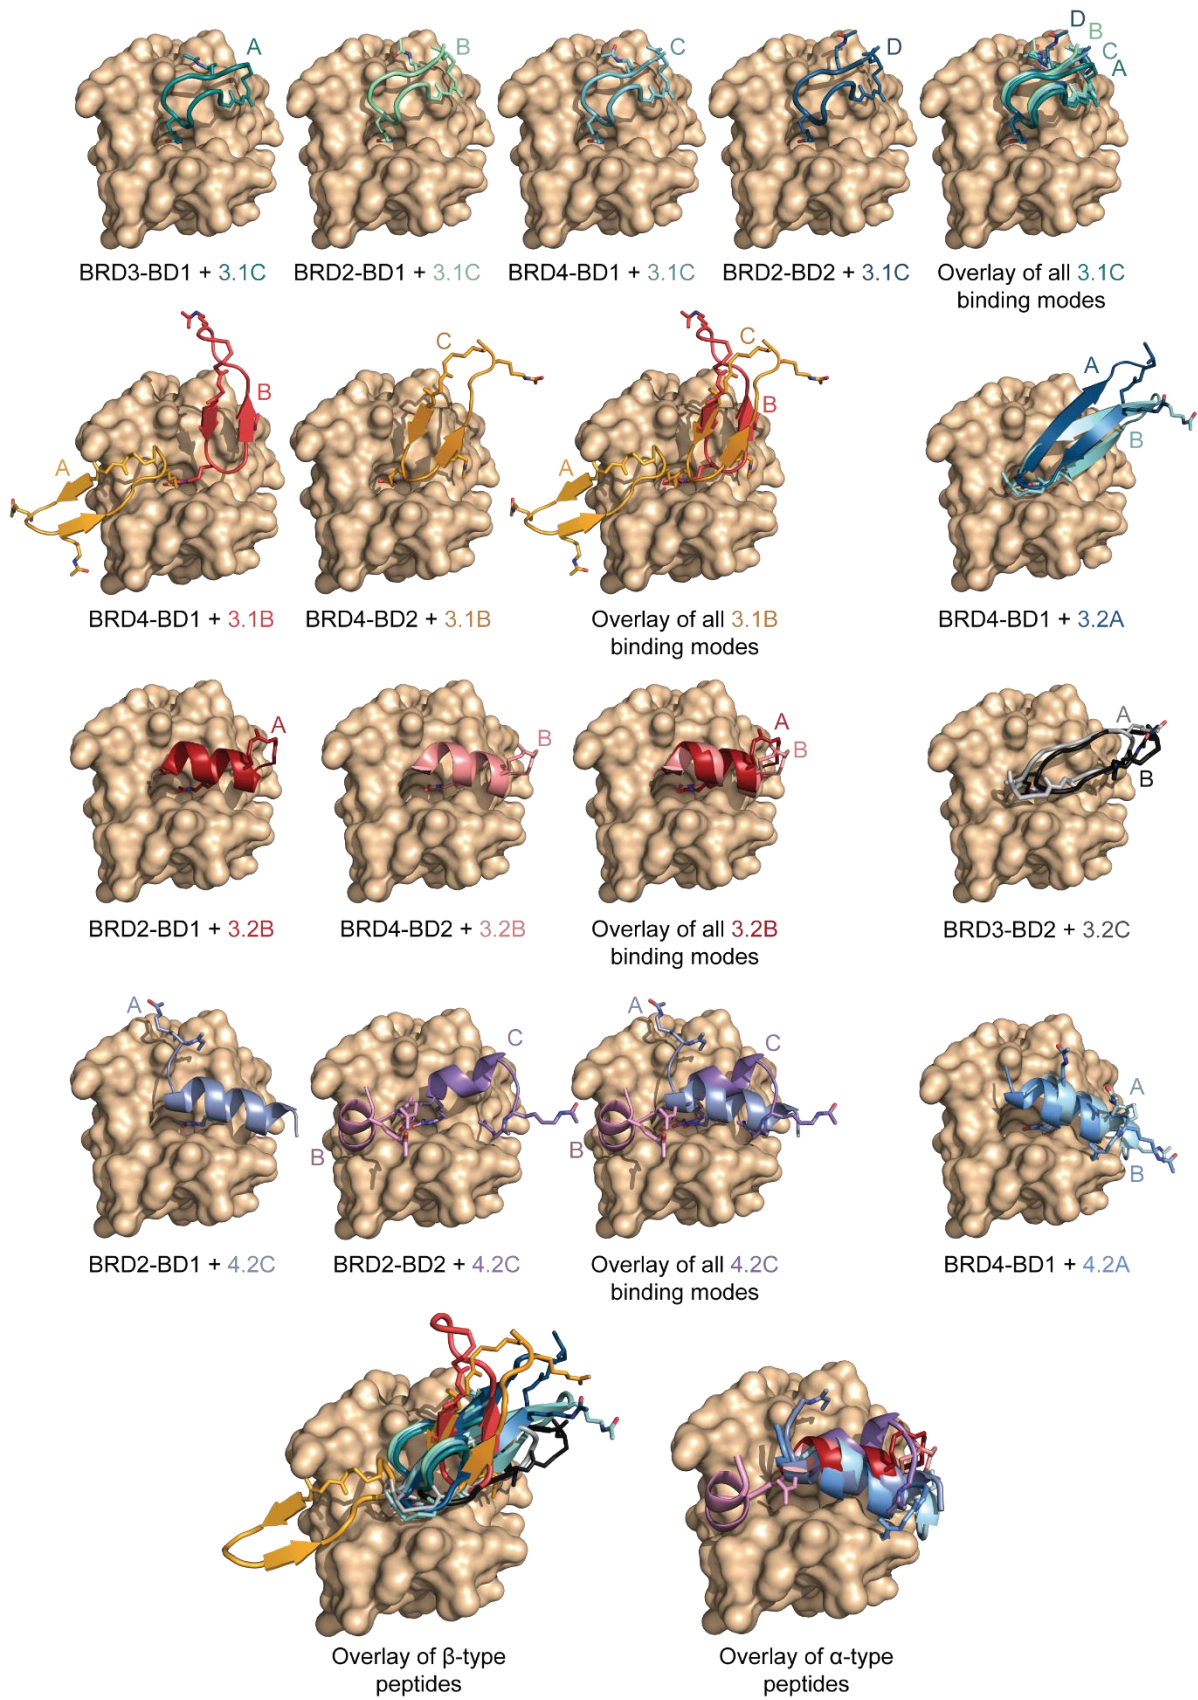

**Supplementary Figure 7. RaPID cyclic peptide structure summary**

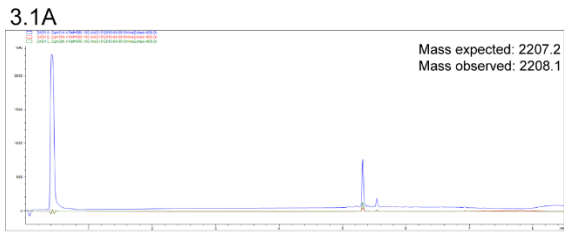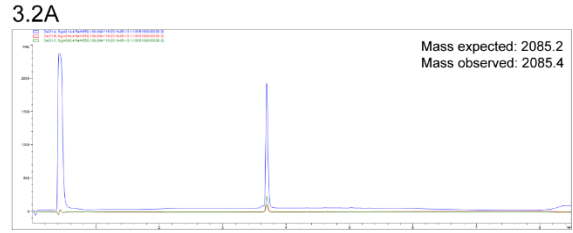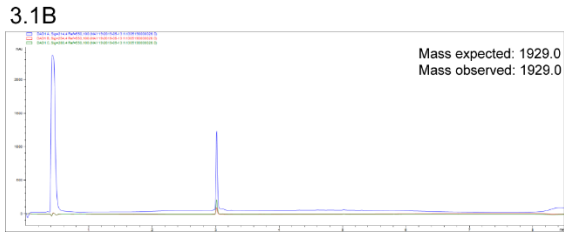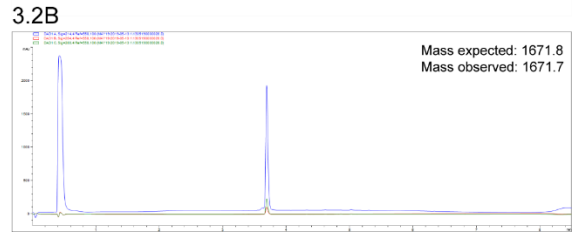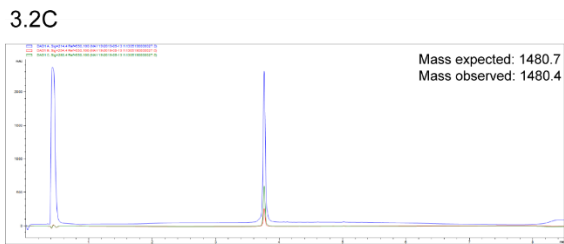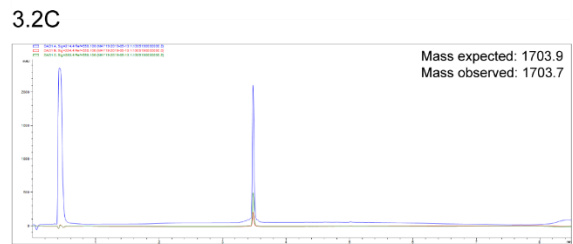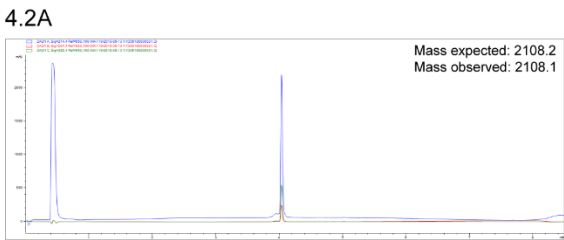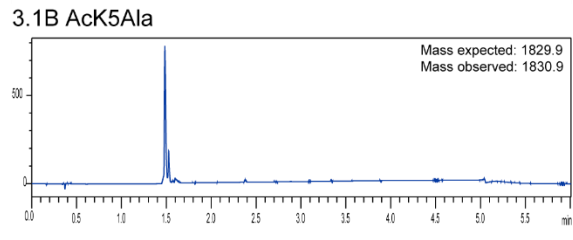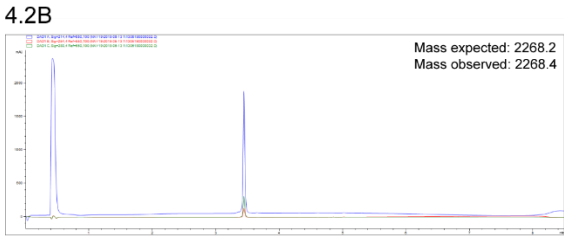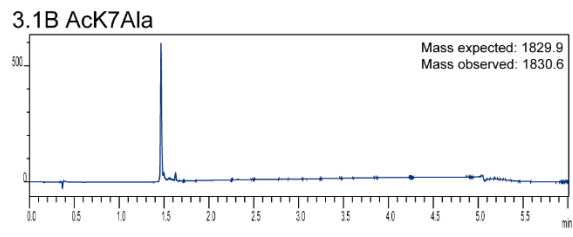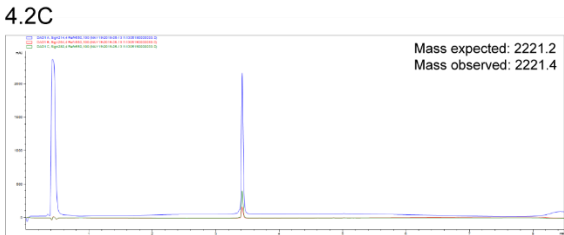

**Supplementary Figure 8. HPLC traces of all RaPID peptides**
